# Supplementary material for: Multipotent luminal mammary cancer stem cells model tumor heterogeneity
Source: Springer Nature journal article supplement (doi:10.1186/s13058-015-0615-y), 2015-10-14
Supplement: MOESM1 [file 9781518]

## Supplemental Experimental Procedures

**Table S1. Oligonucleotides**

| Gene           | GenBank-EMBL number | Primer 1 (forward)       | Primer 2 (reverse)        |
|----------------|---------------------|--------------------------|---------------------------|
| GAPDH          | NM_008084           | AGGTCGGTGTGAACGGATTTG    | TGTAGACCATGTAGTTGAGGTCA   |
| $\beta$ -actin | NM_007393           | GGCTGTATTCCCCTCCATCG     | CCAGTTGGTAACAATGCCATGT    |
| $\beta$ casein | NM_009972           | GGCACAGGTTGTTTCAGGCTT    | AAGGAAGGGTGCTACTTGCTG     |
| Bcl214         | NM_025778           | TGGCCTTCTACGCCAGACA      | CCAGGAATCAGTTGACCAAGTC    |
| Bgt2           | NM_007570           | ATGAGCCACGGGAAGAGAAC     | GCCCTACTGAAAACCTTGAGTC    |
| Ccnd2          | NM_009829           | GAGTGGGAACTGGTAGTGTG     | CGCACAGAGCGATGAAGGT       |
| Cdh1           | NM_009864           | GCCATTGCCAAGTACATCCT     | TATCTCCATGGGATCCTCCA      |
| Cldn7          | NM_001193619        | GGAGACACTGACAGGCTCAGGTGC | GGCGACCCGCTTCACCGCTC      |
| Csn3           | NM_007786           | ATTCTGGCATTAACTCTGCC     | AAAGATGGCCTGTAGTGGTAGTA   |
| Epcam          | NM_008532           | TCAGAGCTTGCAGACTGCGCT    | TCGAGCGGCTCTCCGTTCACT     |
| Elf5           | NM_010125           | CTGGGAGCGCGCTTGCCCTC     | TCGGTCCAAGGCATCAGGGGG     |
| ER alpha       | NM_007956           | TGCACCATTGACAAGAACCGBA   | AGCACCCATTTCAATTCGGCCT    |
| ErbB2          | NM_001003817        | GGCACTGTCTACAAGGCAT      | GAGGCGGGACACATATGGAG      |
| Esrp1          | NM_194055           | TGGTGCTTTTTGGGATCACTG    | CCACGACTTTCCATAACAGCAG    |
| Fabp4          | NM_024406           | GGATTTGGTCACCATCCGGT     | TTCACCTTCTGTCTGTCTGC      |
| Fabp5          | NM_010634           | ACGGGAAGGAGAGCACGATA     | GAGTGCAGGTGGCATTGTTC      |
| Foxa1          | NM_008259.3         | TGGCTCCAGGATGTTAGGGA     | GTGTCCCGCTAGTAGCTGTT      |
| Foxi1          | NM_023907           | CGAAGGTGGTGGCGAATAC      | TGAGGGCTGAATAGGAATATGGT   |
| Gata3          | NM_008091           | AGGCAACCACGTCCCGTCTT     | TACCTGGCTCCCGTGGTGGG      |
| Grhl1          | NM_001161406        | AGGGTGCAAGTGCTGAAAAAC    | TGGCCTCTCTTATCAATGCC      |
| Hif-1 $\alpha$ | NM_010431.2         | GAAATGGCCCAGTGAGAAAA     | CTTCCACGTTGCTGACTTGA      |
| Hivep3         | NM_010657           | AGAGGCCATTCAGACGAGTGT    | CTGCGGAAGCTGAGAGATGT      |
| Kit            | NM_001122733        | GCCTGACGTGCATTGATCC      | AGTGGCCTCGGCTTTTTCC       |
| Lgals1         | NM_008495           | GTGCCTACACTTCAATCCTCG    | GTTCCCGGTGTTCCGGTTC       |
| Mmp2           | NM_008610           | TGGCAGCCCATGAGTTCGGC     | TCGGGGGAGGGCCCATAGAG      |
| Noxo1          | NM_027988           | GCTCCATTGCTGACACGTC      | AGGTTTGGGTACAAAGAAGCC     |
| Nrg1           | NM_178591           | ATGGACAGCAACCCAAGTTC     | CTGCTGGGTTAGTCCTGCTC      |
| Perp           | NM_022032           | ATCGCCTTCGACATCATCGC     | CCCCATGCGTACTCCATGAG      |
| Perilipin1     | NM_175640           | GAGTGTGGGGTCTTGGGCGT     | TCACAGGTCCCGCTCACCACA     |
| Perilipin2     | NM_007408           | TGCGGCCATGACAAGTGCCC     | CGCCCCAGTTACGGCACCTC      |
| PPAR- $\delta$ | NM_011145           | ATGGGACTCACTCAGAGGCT     | TGGCTGTTCCATGACTGACC      |
| PPAR- $\gamma$ | NM_001127330        | CCCAGAGCATGGTGCCTTC      | AGTTGGTGGGCCAGAATGGCA     |
| Ppp1r13b       | NM_011625           | TCCCATCCCCTATGACCACAT    | TTGTTCACTGCTCTCAGTTGG     |
| PR             | NM_008829           | AGGTCTACCCGCCATACCTT     | CTTGCAGCTCCCACAGGTAA      |
| Rb1            | NM_009029           | TGCATCTTTATCGCAGCAGTT    | GTTACACGTCCGTTCTAATTTG    |
| SerpB5         | NM_009257           | GCCCTGAGACTGGCAAATTCA    | GCGCAAGGGACAGAGAAGTA      |
| Snai1          | NM_011427.2         | CTACCGACCTTGCGCGACCC     | AGGTGAACTCCACACACGCGT     |
| Snai2          | NM_011415           | CTGGACCGTTATCCGCCCGC     | TGGAGTGGAGCTGCCGACGA      |
| Twist          | NM_011658.2         | CCACGAGCGGCTCAGCTACG     | AATGACATCTAGGTCTCCGGCCTGC |
| Vdr            | NM_009504           | ACCCTGGTGACTTTGACCG      | GGCAATCTCCATTGAAGGGG      |
| Vim            | NM_011701           | CGTCCACACGCACCTACAG      | GGGGGATGAGGAATAGAGGCT     |

## Supplemental Information

**Table S2. Confusion matrix for the validation dataset (N=511)**

|             | Basal like** | HER2**    | Luminal A** | Luminal B** |
|-------------|--------------|-----------|-------------|-------------|
| Basal like* | <b>94</b>    | 1         | 0           | 0           |
| HER2*       | 0            | <b>39</b> | 1           | 18          |
| Luminal A*  | 0            | 2         | <b>210</b>  | 19          |
| Luminal B*  | 0            | 2         | 37          | <b>88</b>   |

\* annotated human breast cancer subtypes. \*\* predicted human breast cancer subtypes. The bold numbers represent concordant calls. It can be seen that the major prediction errors are made between the two luminal types.

**Table S3. Cell line properties**

| Cell Line | Origin                                   | MaCSC Properties |              |               |                          |               | Tumor Type  | Ref |
|-----------|------------------------------------------|------------------|--------------|---------------|--------------------------|---------------|-------------|-----|
|           |                                          | K8+K14+          | Self Renewal | Mammo-spheres | Alveolar Differentiation | Tumorigenesis |             |     |
| Py230     | Primary C57Bl/6 PyVmT tumor              | Yes              | Yes          | Yes           | Yes                      | Yes           | Luminal     | 10  |
| Py9813    | Primary FVB/N PyVmT tumor                | Yes              | Yes          | Yes           | Yes                      | Yes           | Luminal     |     |
| Py117     | In vivo passage of Py230 tumor           | Yes              | Yes          | Yes           | Weak                     | Yes           | Basal       |     |
| Py15-4    | In vivo passage of Py230 tumor           | Yes (weak)       | Yes          | Yes           | No                       | Yes           | Claudin-low |     |
| Py16-1    | In vivo injection of DMSO Tx Py230 cells | Yes (weak)       | Yes          | Yes           | No                       | Yes           | Claudin-low |     |

**Table S4. 37 geneset**

| <b>gene name</b> |
|------------------|
| 1810046J19Rik    |
| 1700052N19Rik    |
| Agr3             |
| Agr2             |
| Ar               |
| Abcc3            |
| Actr3b           |
| BC048546         |
| Bspry            |
| Bub1             |
| Cdh1             |
| Car12            |
| Ccnb2            |
| Cgn              |
| Cldn4            |
| Creb3l4          |
| Epn3             |
| ErbB2            |
| Esr1             |
| Dnajc12          |
| Grb7             |
| Gata3            |
| Il6st            |
| Fbp1             |
| Fa2h             |
| Foxa1            |
| Foxc1            |
| Hsd17b2          |
| Mal2             |
| Myo6             |
| Myb              |
| Mia1             |
| Psmc3            |
| Tcap             |
| Tmem45b          |
| Slc39a6          |
| Xbp1             |
