# Supplementary material for: Multipotent luminal mammary cancer stem cells model tumor heterogeneity
Source: Springer Nature journal article supplement (doi:10.1186/s13058-015-0615-y), 2015-10-14
Supplement: MOESM2 [file 9781518]

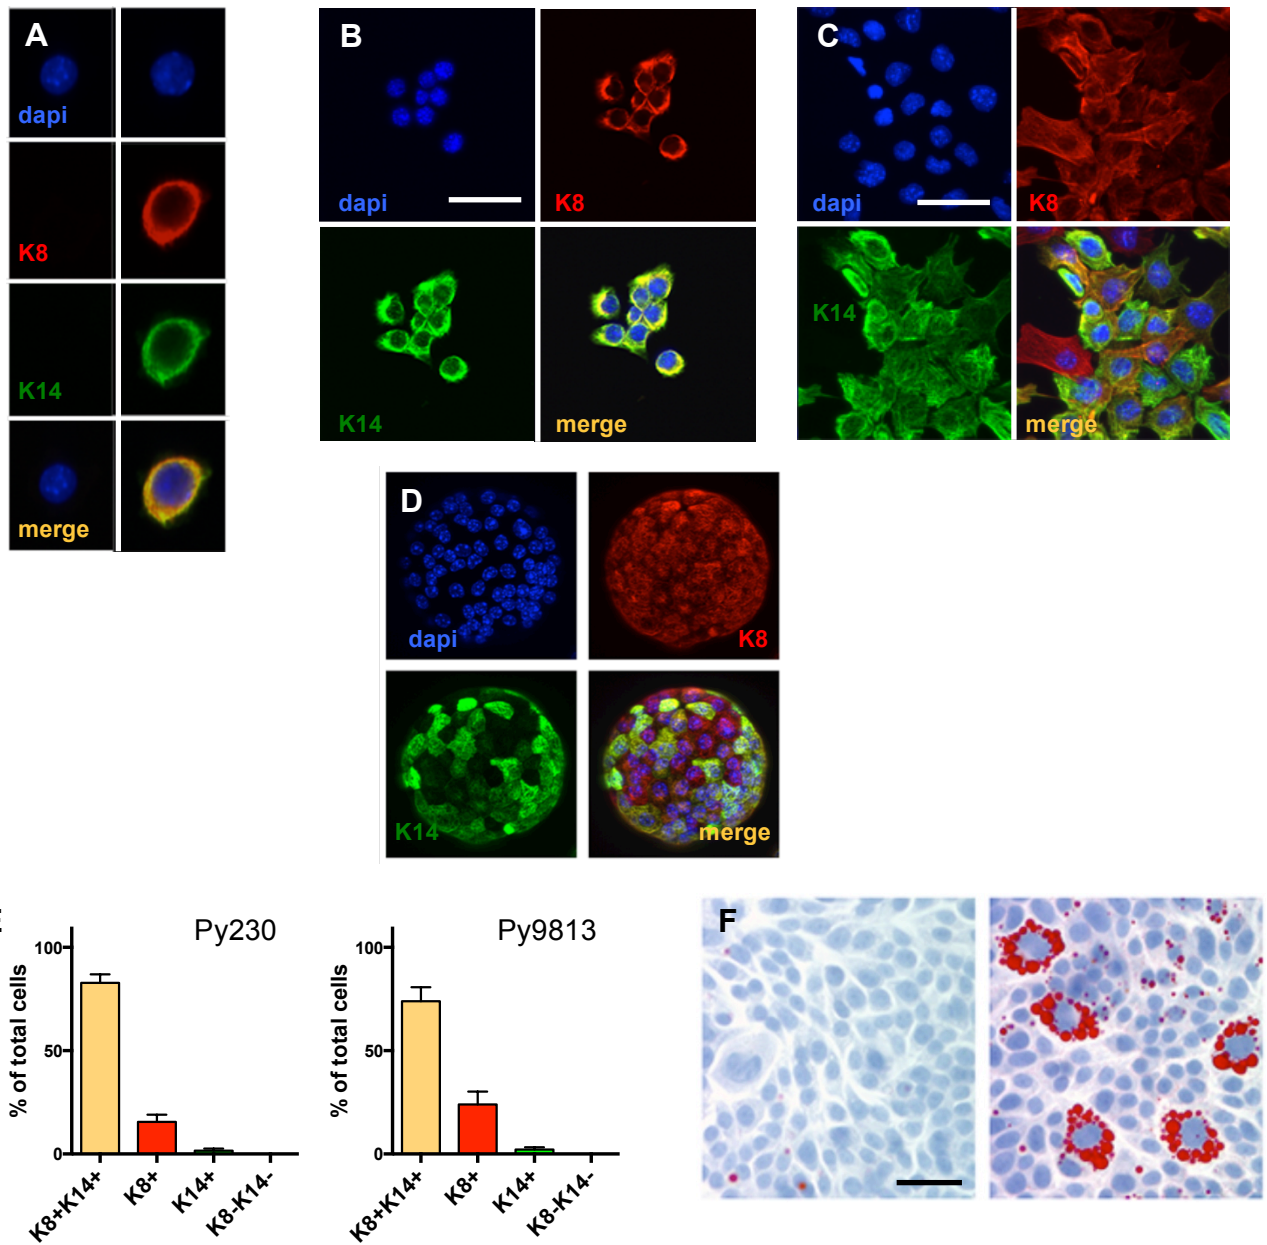

**Figure S1. Clonal MaCSC differentiation.** A. Clonal single cells from FVB/N cell line Py9813 are K8K14 positive. Left panel stained with secondary antibody alone. B. Early colonies contain only double positive cells. Scale bar 20  $\mu$ m C. In 2-dimensional cultures, K8+K14+ Py9813 cells can self renew or differentiate to form single positive K8 or K14 positive cells. Scale bar 20  $\mu$ m D. Py9813 cells form hollow mammospheres that show the presence of double positive cells and K8 single positive luminal cells. Single positive myoepithelial cells are less commonly observed. Scale bar 20  $\mu$ m E. The percentage of double positive, single positive and double negative cells in IF stained 2-D cultures. ANOVA showed the groups were highly significantly different,  $p < 0.0001$  and by Holm-Sidak's multiple comparisons test, there were significantly fewer K8+ and K14+ cells compared with K8+K14+ cells,  $p < 0.0001$  and significantly fewer K14+ cells than K8+ cells,  $p < 0.01$  in both cell lines. No double negative cells were observed in cultures of either cell type. Data are means  $\pm$  SEM. F. Cultures of control or 300 nM retinoic acid treated Py9813 cells stained with oil red O. Scale bar 20  $\mu$ m.
