# Supplementary material for: Multipotent luminal mammary cancer stem cells model tumor heterogeneity
Source: Springer Nature journal article supplement (doi:10.1186/s13058-015-0615-y), 2015-10-14
Supplement: MOESM3 [file 9781518]

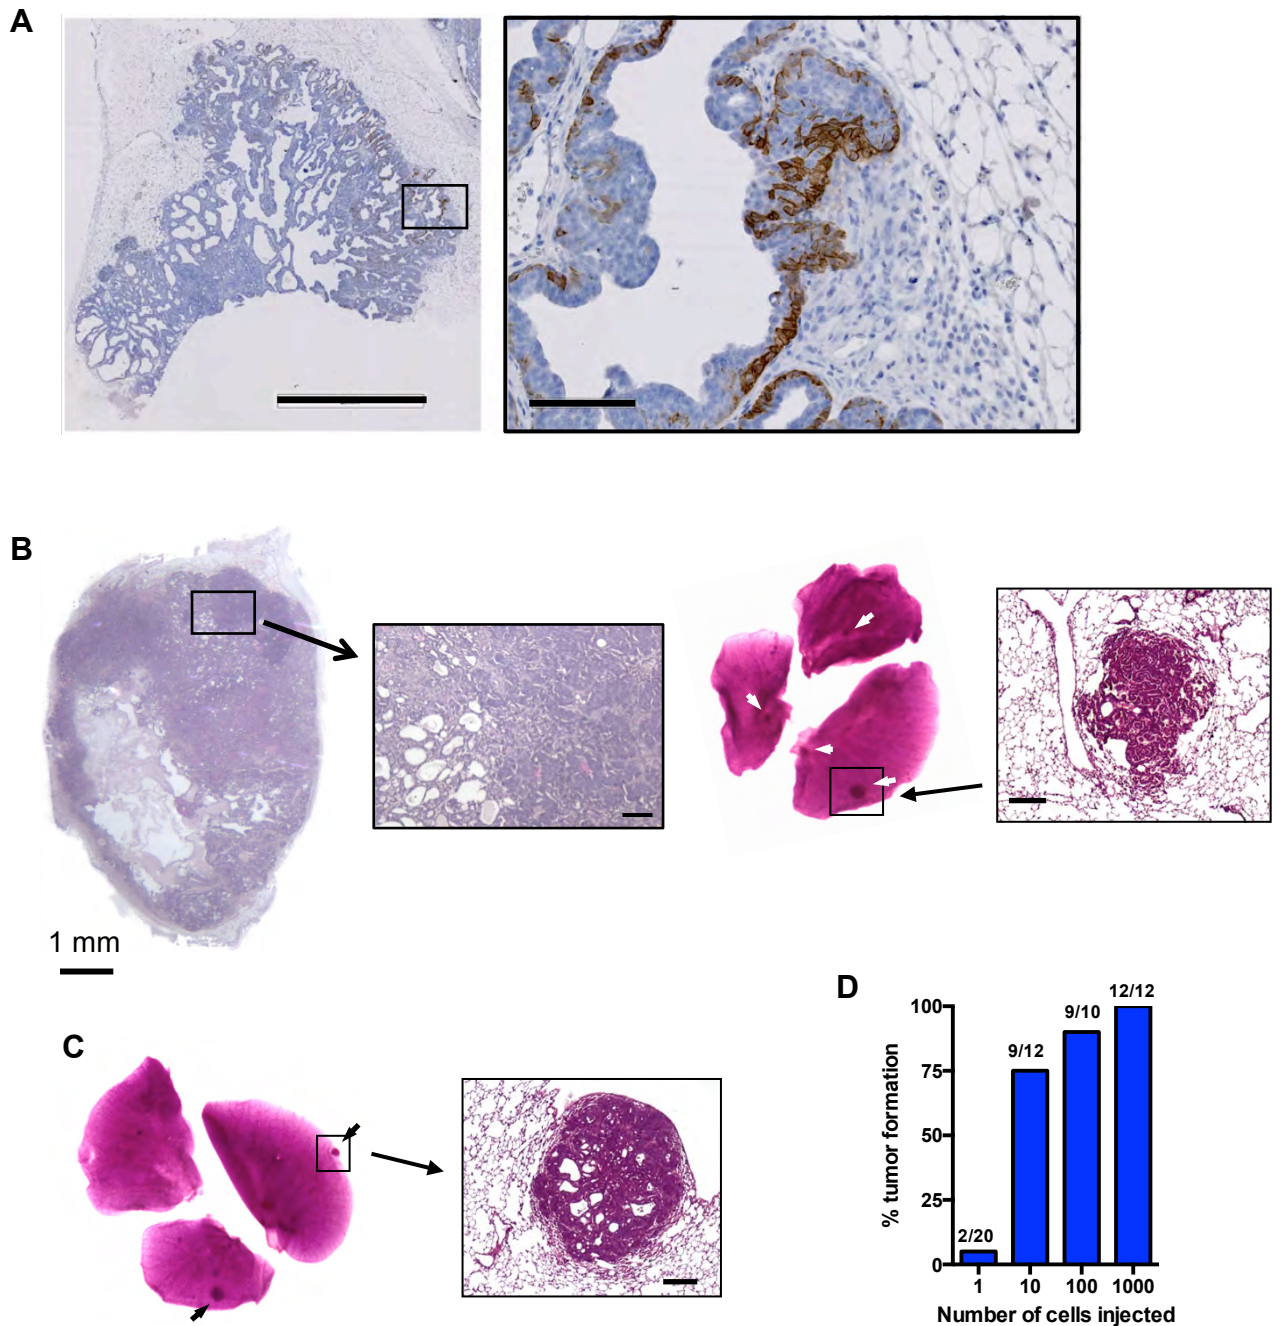

**Figure S2. Py230 MaCSCs recapitulate spontaneous tumorigenesis and metastasis** A. Left panel - A Py230 MIN outgrowth in the cleared mammary fat pad. Scale bar = 2 mm. Right panel – Higher magnification showing K5 positive cells (brown) lining the hyperplastic ductal structures. Scale bar = 100  $\mu$ m. B. Tumor formed from a single Py230 cell injected into the cleared mammary fat pad of a 3-week old mouse. Inset - at 29 weeks the tumor showed microcystic and solid areas of adenocarcinoma. Scale bar 200  $\mu$ m. Lung metastases indicated by the arrow white arrows were observed in whole mounts of the lung. Inset shows H&E stained lung metastasis. Scale bar 100  $\mu$ m. C. Lung metastases (black arrows) visualized in whole mounts of a lung from a wild type mouse with a 10-cell Py230 tumor. Inset shows H&E stained lung metastasis. Scale bar 100  $\mu$ m. D. Percentage of tumors formed by varying numbers of Py230 cells injected in 2 mg/ml matrigel into the cleared mammary fat pads of 3-4 week old female mice.
