# Supplementary material for: Multipotent luminal mammary cancer stem cells model tumor heterogeneity
Source: Springer Nature journal article supplement (doi:10.1186/s13058-015-0615-y), 2015-10-14
Supplement: MOESM4 [file 9781518]

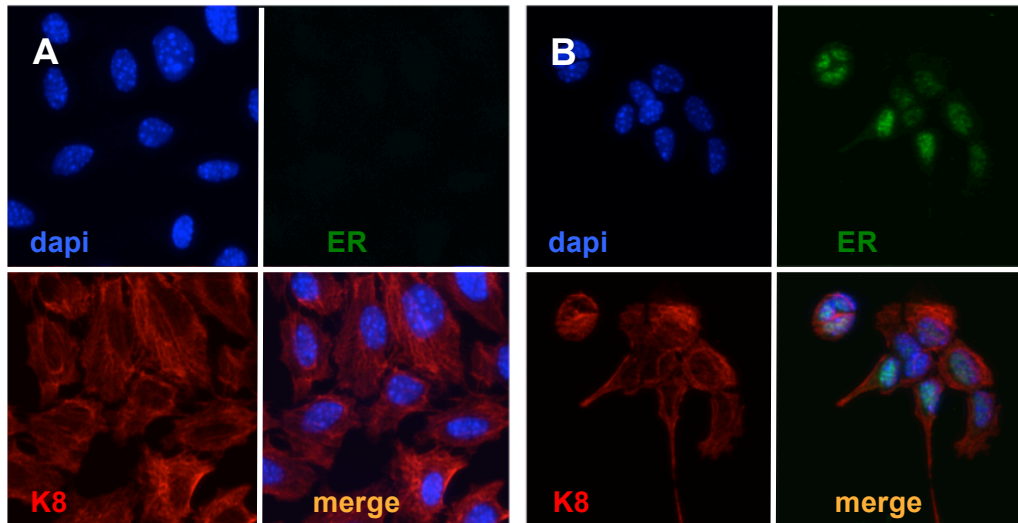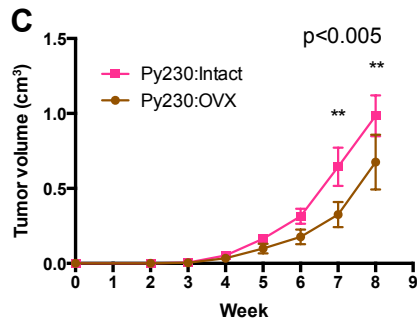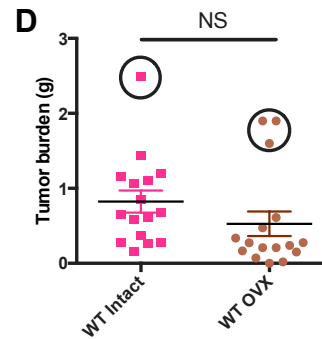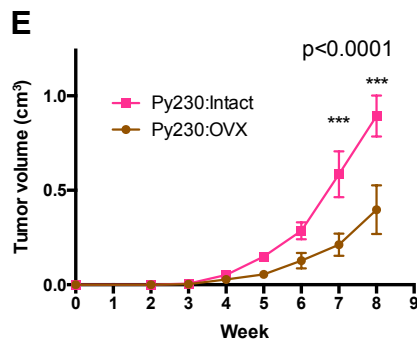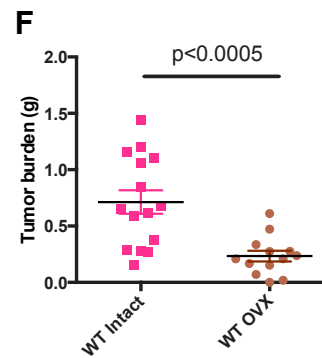

**Figure S3. Py230 cells are estrogen responsive.** A. Py230 cells cultured on glass coverslips for 48h in F12K/DMEM media with 5% fetal calf serum. B. Py230 cells cultured on glass coverslips for 48h in F12K/DMEM media without phenol red with 5% charcoal treated serum. C, D.  $10^4$  Py230 cells injected into intact or OVX female mice were monitored over an 8-week period. Tumor volume and final tumor burden data indicated that the majority of Py230 tumors were sensitive to the presence of endogenous estrogen. Data are means  $\pm$  SEM from 16 tumors in 4 mice per group. E, F. Tumors from the same dataset that have undergone epigenetic/genetic changes resulting in increased growth (encircled in D) have been removed. Data are means  $\pm$  SEM from 15 tumors in intact mice and 13 tumors in OVX mice. Data are representative of 2 similar experiments.
