# Supplementary material for: Multipotent luminal mammary cancer stem cells model tumor heterogeneity
Source: Springer Nature journal article supplement (doi:10.1186/s13058-015-0615-y), 2015-10-14
Supplement: MOESM6 [file 9781518]

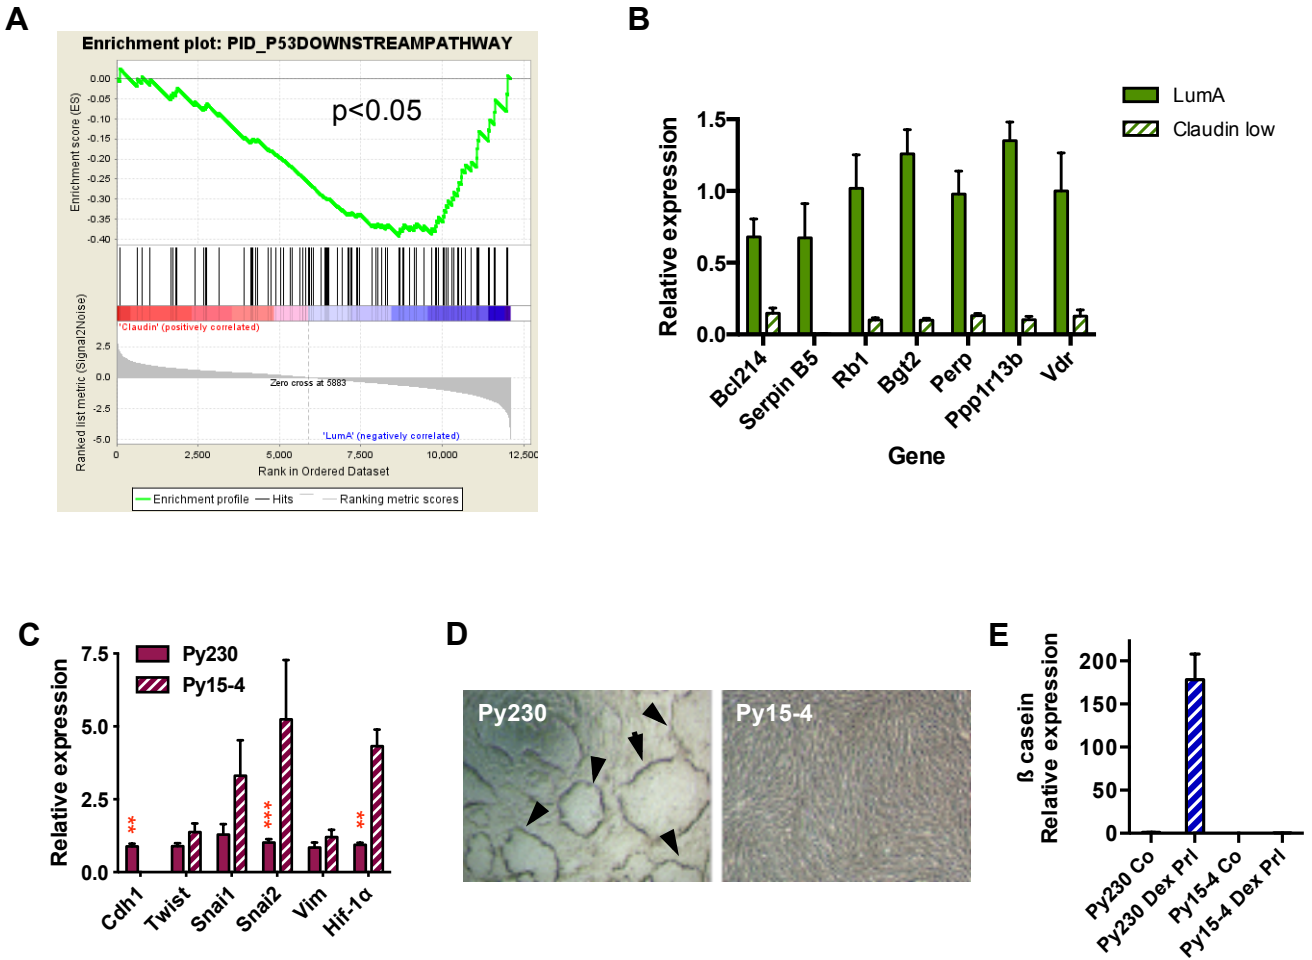

**Figure S5. Divergent mammary cancer stem cell phenotypes.** A. Enrichment plot of p53 pathway genes in LumA or Claudin-low MaCSCs. B. Real time PCR validation of the 7 most highly differentially expressed genes in the p53 pathway analysis. Data are means  $\pm$  SEM of 6 independent tumor samples per group. All groups were significantly different at  $p < 0.005$  or more using the Holm-Sidak correction for multiple comparisons. C. EMT associated gene expression in Py230 and Py15-4 cell lines. D. Confluent cultures of Py230 and Py15-4 MaCSCs treated for 48h with dexamethasone and prolactin. Arrowheads indicate dome formation. E. Relative expression of  $\beta$  casein in Py230 and Py15-4 cultures treated for 48h with dexamethasone and prolactin.
